# Supplementary material
Source: Springer Nature journal article supplement (https://www.springermedizin.de/resource/supplementary/12931_2011_1182_MOESM5_ESM.pdf/9425498)

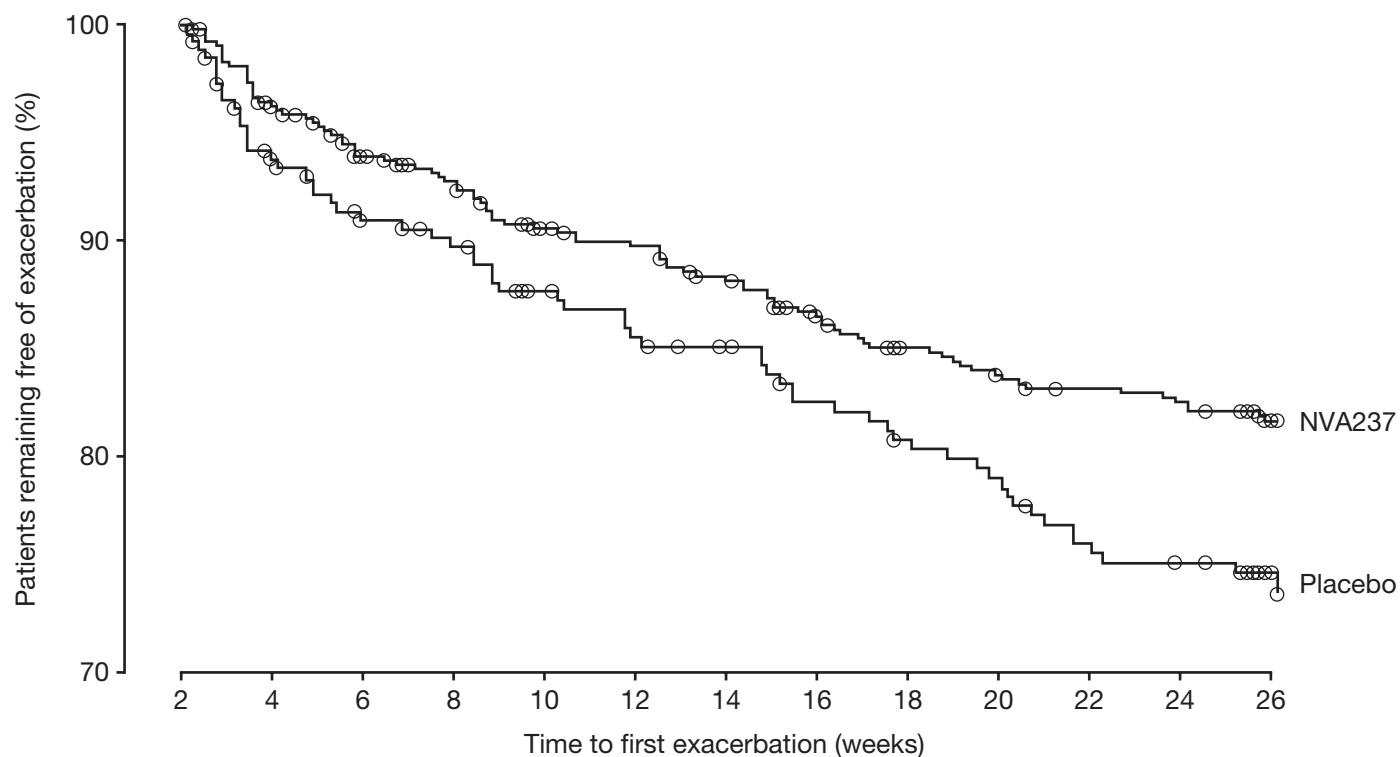

Number at risk

|         |     |     |     |     |     |     |     |     |     |     |     |     |
|---------|-----|-----|-----|-----|-----|-----|-----|-----|-----|-----|-----|-----|
| NVA237  | 490 | 474 | 460 | 447 | 439 | 425 | 411 | 404 | 396 | 393 | 388 | 339 |
| Placebo | 226 | 219 | 211 | 205 | 199 | 194 | 189 | 184 | 178 | 171 | 170 | 146 |

Supplement: MOESM5 [file 9425498]
